# Supplementary material for: Global and Regional Patterns in Riverine Fish Species Richness: A Review
Source: Hindawi journal article supplement (doi:10.1155/2011/967631), 2011-01-01
Supplement: f1 [file 967631.f1.docx]

Electronic Supplementary Appendix for

**Global and regional patterns in riverine fish species richness – A review**

Thierry Oberdorff1, Pablo A. Tedesco1, Bernard Hugueny1, Fabien Leprieur2, Olivier Beauchard3 Sébastien Brosse4 & Hans H. Dürr5

1 UMR IRD 207, Biologie des ORganismes et des Ecosystèmes Aquatiques (BOREA), Département Milieux et Peuplements Aquatiques, Muséum National d'Histoire Naturelle, 43 rue Cuvier, 75231 Paris cedex, France.

2 UMR 5119 (CNRS-IFREMER-UM2-IRD), Laboratoire Ecosystèmes Lagunaires, Université Montpellier 2, Place Eugène Bataillon, 34095 Montpellier Cedex 5, France.

3 University of Antwerp, Faculty of Sciences, Department of Biology, Ecosystem Management Research Group, Universiteitsplein 1, BE-2610 Antwerpen (Wilrijk), Belgium.

4 Laboratoire d’Ecologie Fonctionnelle, UMR 5545, CNRS - Université Paul Sabatier, 118 route de Narbonne, F-31062 Toulouse cedex 4, France.

5 Utrecht University, Faculty of Geosciences, P.O. box 80115, 3508 TC Utrecht, The Netherlands.

**Methods concerning the global scale analysis of species richness (Table 1 and figures 1 and 2)**

***Species richness data***

We used adatabase containing species occurrence for the world’s freshwater fish fauna at the drainage basin scale [1,2]. This database results from an extensive literature survey (bibliographic sources including published papers, books, and grey literature; references available upon request) of both native and non-native freshwater fish species check lists. Only complete species lists at the drainage basin scale were considered. Since each drainage basin is regarded as a biogeographical island [3], only strictly freshwater native species were considered [secondary or migratory euryhaline fishes were systematically withdrawn on the basis of species descriptions provided in Fishbase [4]]. Then, values for total species richness refer to the total number of freshwater native riverine fish species present in a drainage basin. In addition, ancient lakes (Lakes Malawi, Tana, Kivu, Tanganiyka, Albert, Edward, Victoria, Turkana, Kyoga, Baikal, Titicaca and Biwa) and their fish fauna were removed from the database to avoid any bias related to differences in speciation processes between ancient lakes and rivers [5].

***Current and historical environmental data***

We collected data related to habitat size and diversity, geographical and topographical isolation, and contemporary and historical climate for each drainage basin (see Table S1 for a list of variables, corresponding references and units). A Geographic Information System of the global river systems and the corresponding drainage basin limits [6] was applied to extract absolute or mean values for these variables. Overall, we used 11 predictor variables to evaluate the effect of environmental, topographical and historical conditions.

We collected four variables related to habitat size and heterogeneity: drainage surface area (*DSA*), habitat heterogeneity (*HH*), mean annual runoff (*ROann*) and altitudinal range (*ALTrange*). Habitat diversity was estimated by applying Shannon’s diversity index to proportions of biomes (i.e. vegetation types associated with regional variations in climate) within drainage basins. Two different biome categories were used as defined by Olson et al. [7] and Ramankutty & Foley [8] and finally averaged to obtain a mean habitat diversity value.

Contemporary climate was described by temperature (*T*), precipitation (*PR*), precipitation seasonality (*PRseason*) and actual evapotranspiration (*AETann*). To reduce co-linearity between predictor variables (Variable Inflation Factor < 5), our ‘temperature’ variable *T* resulted from the first principal component of a PCA performed on *Tmin*, *Tmax*, *Tann* and *Tcv*, reflecting both temperature and its seasonality, as they are highly correlated. The same analysis was performed for precipitation-related variables *PRmin*, *PRmax*, *PRann* and *PRcv*. The first axis was retained as a measure of precipitation (*PR*), and the second axis as a measure of seasonality (*PRseason*). Contemporary climate was also described by mean values of actual evapotranspiration (*AETann*).

Following Oberdorff et al. [9], we also considered whether or not a drainage basin was on a land mass, a peninsula, or an island (*LPI*; continental mass = 0; peninsula = 1; island = 2). This can be intuitively related to geographical isolation since colonization rates in peninsulas and islands should be sufficiently low to favour the formation and maintenance of endemic species.

Finally, historical conditions were quantified by the Quaternary climate variability and the related glacial history. Insolation changes caused by the earth’s obliquity cycles (i.e. Milankovitch climate oscillations) are responsible for large temperature changes toward the poles. Orbital dynamics are thought to have driven Quaternary periodic glacial events but their effects in earlier times are also coming to light and have certainly produced important climatic changes through the Cenozoic [10]. Quaternary climate stability was measured as the change in mean annual temperature between the present and the Last Glacial Maximum (LGM, *circa* 21 thousand years ago) estimated from six different global circulation models (GCM, to account for variation among models; see [11]). This measure closely relates to the amplitude of Quaternary climatic oscillations [12]. For each GCM, the change in mean annual temperature between the present and the LGM was calculated and the resulting values were averaged to produce an overall anomaly variable *Tanomaly* [11].

***Spatial autoregressive model***

Spatial autocorrelation may be present in these geographic data leading to non-independence of residuals and thus violating one of the assumptions of standard regression analysis. From the various methods currently available to account for spatial dependence in geographic data [partially reviewed in [13,14]], spatial autoregressive model (SAR) is best suited to our case assuming that the autoregressive process occurs in the error term (i.e. the “spatial error model” described by Dormann et al. [13]). Spatial analysis was performed with R statistical package [15] and *spdep* library [16] applying the ‘errorsarlm’ function. The spatial structure was implemented by a neighbourhood matrix of the drainage basins constructed as in previous works [17,18]. The vertices are drainage basins and the edges contiguity between basins. Geographical distance between drainage basins was defined as the minimum number of divides separating basins along the neighbourhood graph. A value of 1 corresponds to drainage basins that are contiguous. Four distance classes were retained since no autocorrelation was detected after the forth distance class on species richness values. The logarithm of species richness was used as the response variable and all other environmental variables as explanatory ones in a single spatial autoregressive model.

**Table S1**. Environmental and historical variables considered in the analysis, their abbreviation and reference source.

| Variables | *Abbreviations* | Sources |
| --- | --- | --- |
| Mean annual temperature (°C) | *Tann* | [19] |
| Minimum annual temperature (°C) | *Tmin* | [19] |
| Maximum annual temperature (°C) | *Tmax* | [19] |
| Standard deviation of mean monthly temperature | *Tcv* | [19] |
| Annual total precipitation (mm) | *Pann* | [19] |
| Minimum annual precipitation (mm) | *Pmin* | [19] |
| Maximum annual precipitation (mm) | *Pmax* | [19] |
| Standard deviation of monthly precipitation | *Pcv* | [19] |
| Annual actual evapotranspiration (mm/year) | *AETann* | [20-22] |
| Mean annual surface runoff (mm/year) | *ROann* | [23] |
| Drainage basin surface area (km2) | *DSA* | This study |
| Land-Peninsula-Island | *LPI* | This study |
| Altitudinal range (m) | *ALTrange* | http://edc.usgs.gov/products/elevation/gtopo30/gtopo30.html |
| Habitat heterogeneity (Shannon diversity index) | *HH* | [7,8] |
| Historical temperature anomaly (difference between current and Last Glacial Maximum mean annual temperature (°C) | *Tanomaly* | Global Circulation Models: BMRC2, CCC2.0, CCM1, GEN2, UGAMP, UKMO from the Paleoclimate Modelling Intercomparison Project (PIMP)  http://pmip.lsce.ipsl.fr/ |
